# Supplementary material for: Chemokine treatment in growth plate fracture: a pivotal role of CCL9
Source: Research Square preprint supplement (doi:10.21203/rs.3.rs-7127377/v1), 2025-09-01
Supplement: Supplementary file 1 [file 80c4e472efaebf2d17dd1276.docx]

**Supplementary Figure legends**

**
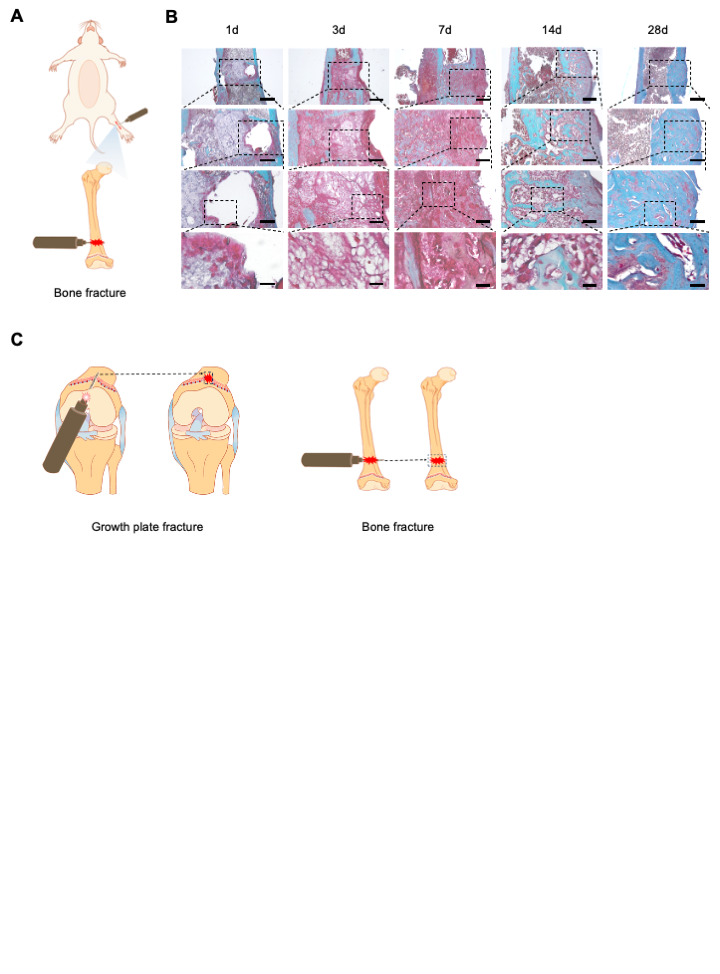
**

**Supplemental Figure 1**(**A**) Schematic image to show a cortical bone drill-hole model. (**B**)Images of Safranin O/Fast Green staining of bone sections prepared from mice with bone defects at days 3, 7, 14 and 28 after injury. The black arrow indicates the damaged area and is enlarged below it. Scale bars, 500 μm (upper panel) ; 200 μm; 100 μm; 20 μm (lower panel). (**C**)Schematic image to show a comparable analysis between epiphyseal drill-hole model and cortical bone drill-hole model


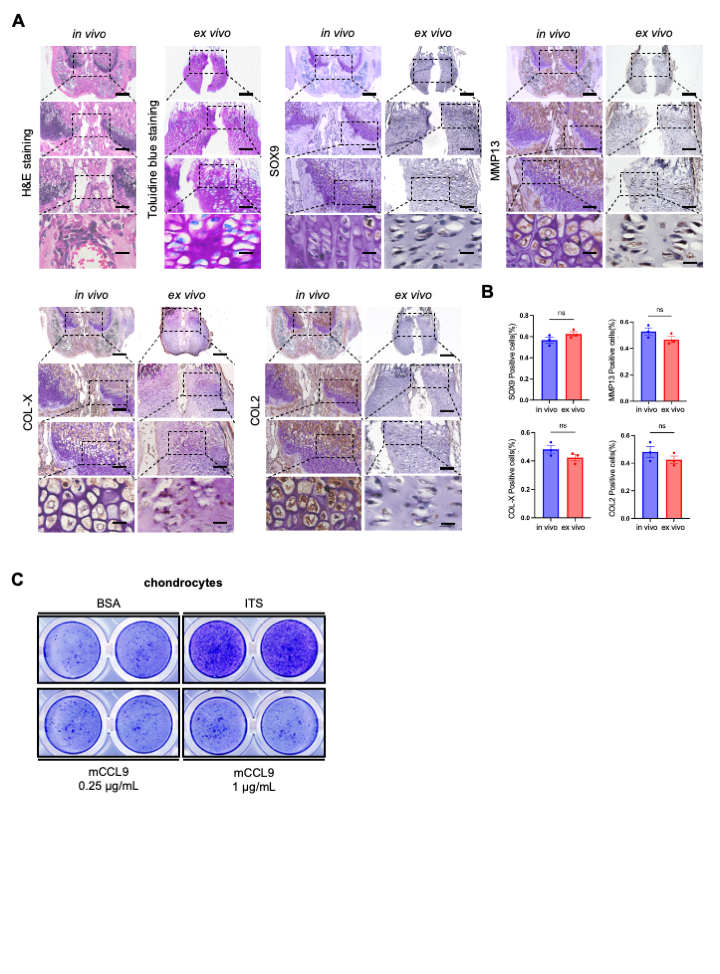


**Supplemental Figure 2**(**A**)Evaluation of epiphyseal explant drill-hole model. (**B**) Statistical analysis of (A). (**C**) Toluidine blue staining images to show *ex vivo* chondrogenesis in incubated with or without mCCL9 for 5 days


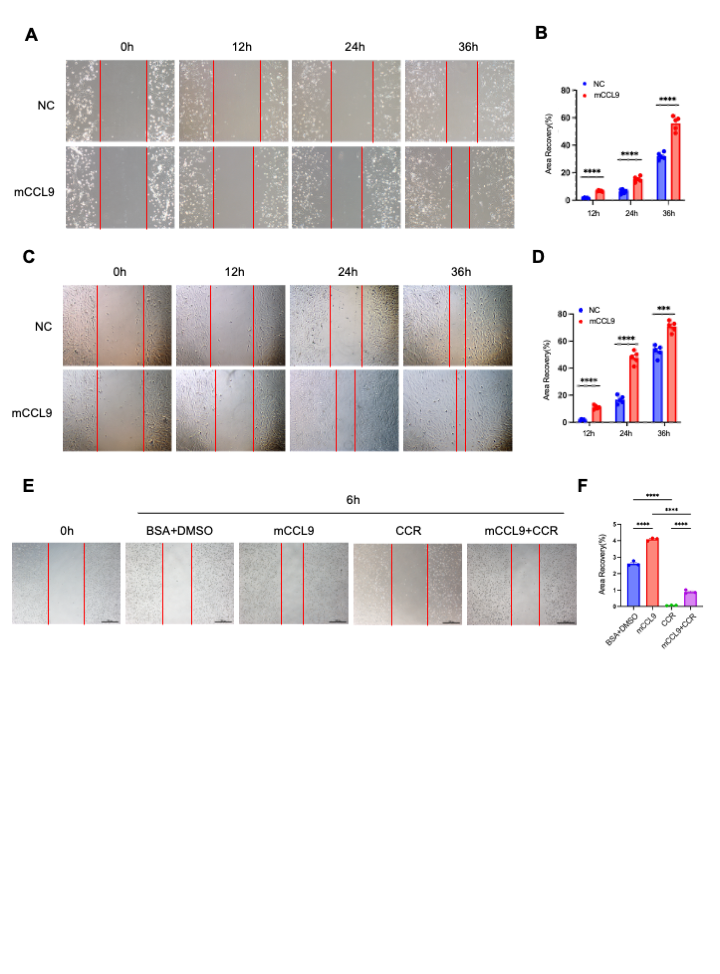


**Supplemental Figure 3 Recombinant mCCL9 promotes rat and murine BMSC migration *ex vivo.*** (**A**)Scratch assay showing migrated murine BMSCs after incubation with 0.25 µg/mL mCCL9 for 0, 12, 24 or 36 h. (**B**)Statistical analysis of (A). (n = 5/group). (**C**)Scratch assay showing that rat BMSCs migrated following incubation with 0.25 µg/mL mCCL9 for 0, 12, 24 or 36 h. (**D**)Statistical analysis of (c). (n = 5/group). (**E**)Scratch assay showing migrated murine BMSCs after incubation with 0.25 µg/mL mCCL9 for 6 h which treated with or without CCR1 antagonist. (**F**)Statistical analysis of (F). (n = 3/group)


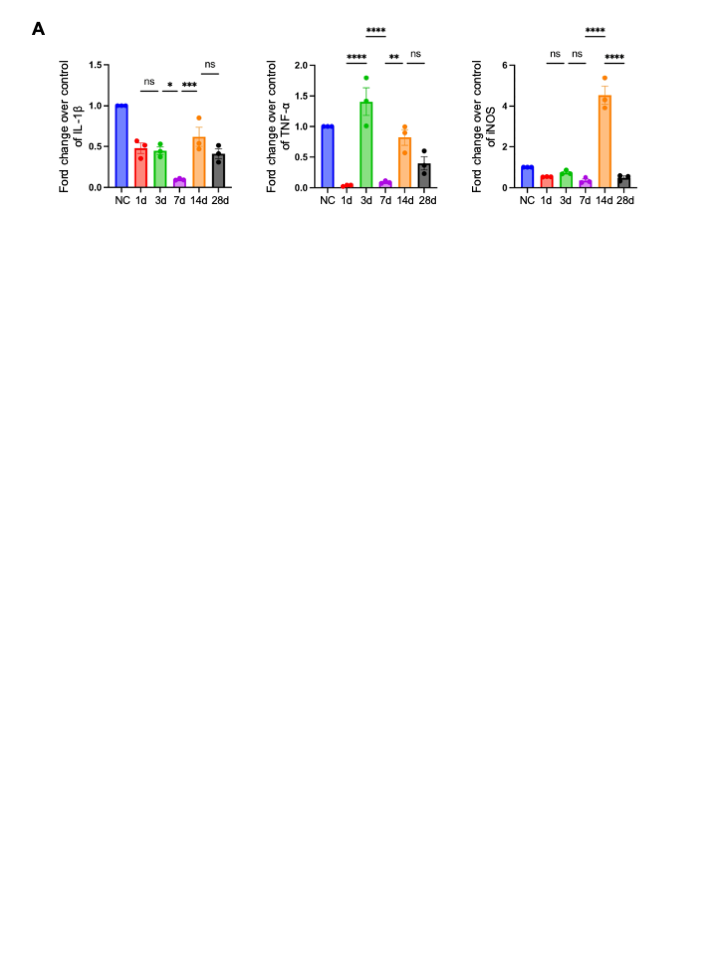


**Supplemental Figure 4****Dynamic changes of pro-inflammatory factor expressions during growth plate drilling-hole fracture repair*.*** (**A**)Q-PCR analysis of IL-1ß, TNF-ɑ and iNOS mRNA relative expression levels in drilling-hole growth plate tissues at days 1, 3, 7,14 and 28 after injury
